# Supplementary material
Source: PubMed Central journal article supplement (PMC4326381)
Supplement: 12192_2014_554_MOESM1_ESM.pdf [file 12192_2014_554_MOESM1_ESM.pdf]

Supplemental Data

Figure S1

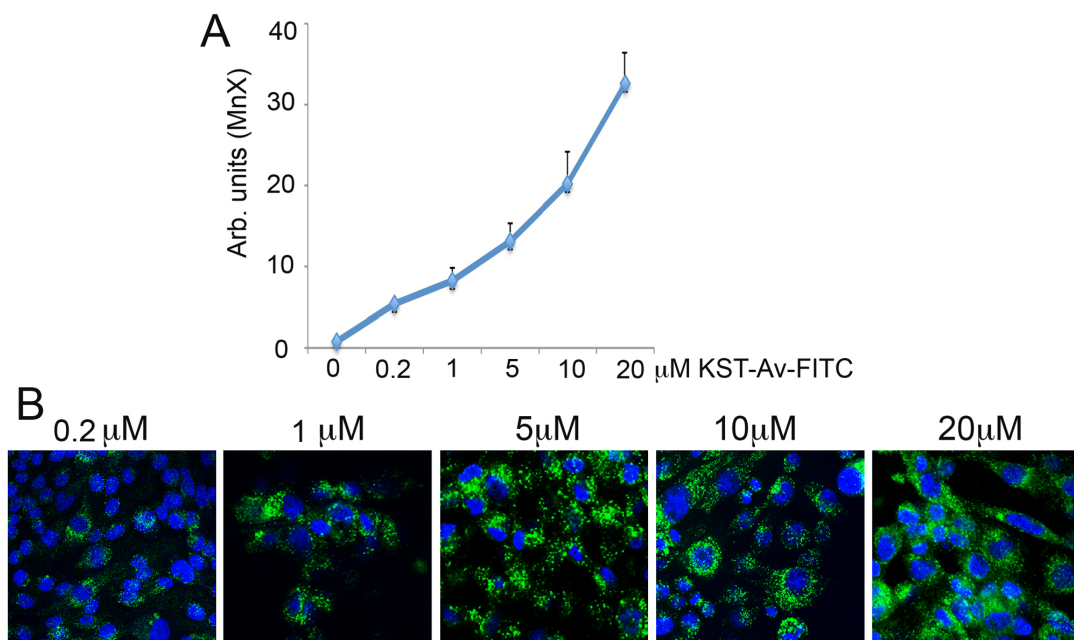

Figure S1. KST-Av-FITC complex is detectable in SK-N-SH cells even if it has been used in low concentration.

KST-Av-FITC complex was added to a cell culture medium of SK-N-SH cells in the indicated concentrations and analyzed with flow cytometry (A) or confocal microscopy (B).

Figure S2

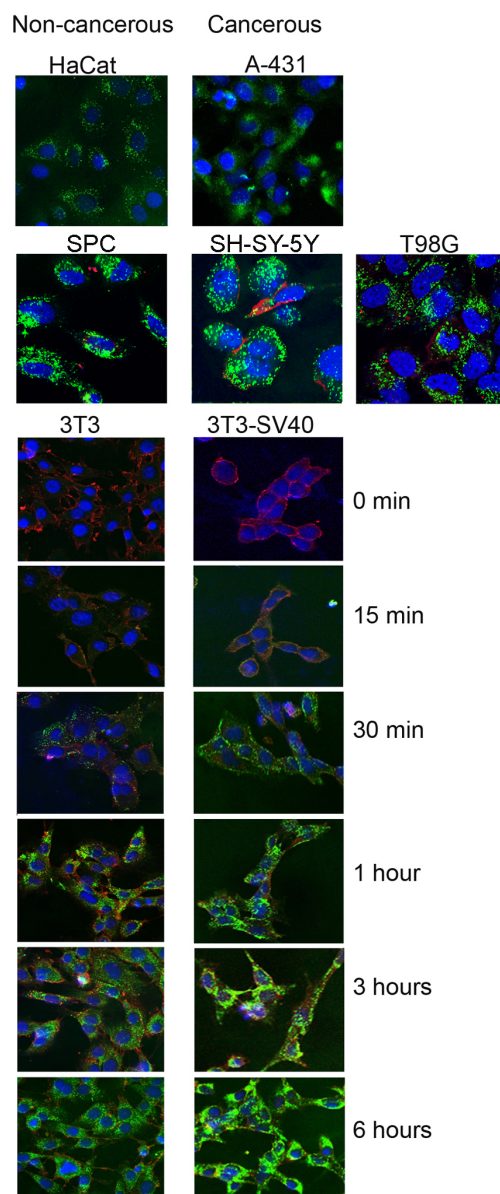

Figure S2. KST-Av-FITC complex is able to penetrate into cells of all cell lines used in study independently of their origin and cancer or non-cancer nature.

Groups of cell lines with common origins were incubated with KST-Av-FITC complex for 6 hours or the time indicated. Groups were (1) immortal human keratinocytes HaCat and epidermoid carcinoma (upper panel), (2) human embryonic neurons SPC (bearing both glial and neuronal markers), human neuroblastoma SH-SY-5Y cells and human glioblastoma T98G cells (middle panel) and (3) immortal mouse fibroblasts 3T3 and the more malignant 3T3-SV40). Nuclei were stained with DAPI, cell surfaces with CellVue® Claret Far Red reagent.
